# Supplementary material for: D-Lactic Acid Production from Sugarcane Bagasse by Genetically Engineered Saccharomyces cerevisiae
Source: MDPI journal article supplement (doi:10.3390/jof8080816), 2022-08-03
Supplement: s1 [file s1]

## Supporting Information for

### **D-lactic acid production from sugarcane bagasse by genetically engineered *Saccharomyces cerevisiae***

#### **Authors**

Warasirin Sornlek <sup>1,2</sup>, Kittapong Sae-Tang <sup>1</sup>, Akaraphol Watcharawipas <sup>3</sup>, Sriwan Wongwisansri <sup>1</sup>, Sutipa Tanapongpipat <sup>1</sup>, Lily Eurwilaichitr <sup>4</sup>, Verawat Champreda <sup>1,\*</sup>, Weerawat Runguphan <sup>1</sup>, Peter J. Schaap <sup>2</sup> and Vitor A.P. Martins dos Santos <sup>2,5,6\*</sup>

#### **Affiliation**

<sup>1</sup> National Center for Genetic Engineering and Biotechnology (BIOTEC), 113 Thailand Science Park, Phahonyothin Road, Pathum Thani 12120, Thailand; warasirin@biotec.or.th (W.S.); kittapong@biotec.or.th (K.S.-T.); sriwan@biotec.or.th (S.W.); sutipa@biotec.or.th (S.T.); verawat@biotec.or.th (V.C.); weerawat.run@biotec.or.th (W.R.)

<sup>2</sup> The Laboratory of Systems and Synthetic Biology, Wageningen University and Research, Stippeneng 4, 6708 WE Wageningen, The Netherlands; peter.schaap@wur.nl (P.J.C.); warasirin@biotec.or.th (W.S.)

<sup>3</sup> Department of Microbiology, Faculty of Science, Mahidol University, 272 Rama VI Road, Ratchathewi, Bangkok 10400, Thailand; akaraphol.wat@mahidol.ac.th

<sup>4</sup> National Science and Technology Development Agency, 111 Thailand Science Park, Phahonyothin Road, Pathum Thani 12120, Thailand; lily@nstda.or.th (L.E.)

<sup>5</sup> Laboratory of Bioprocess Engineering, Droevendaalsesteeg 1 6708 PB Wageningen, The Netherlands; vi-tor.martinsdossantos@wur.nl (V.A.P.M.d.S.)

<sup>6</sup> LifeGlimmer GmbH, Markelstrasse, 38, 12163, Berlin, Germany; vitor.martinsdossantos@wur.nl (V.A.P.M.d.S.)

\* Correspondence: verawat@biotec.or.th (V.C.); vitor.martinsdossantos@wur.nl (V.A.P.M.d.S.); Tel.: +66-2564-6700 (ext. 3446) (V.C.); +31-317482865 (V.A.P.M.d.S.)

**Table S1**

Primers used in this study

| Primer Name                                | Sequence (5' to 3')                                                                 |
|--------------------------------------------|-------------------------------------------------------------------------------------|
| DeltaUp_TDH3pro_F                          | ATTAGTATGTAGAAATATAGATTCCATTTTGAGGATTCCTATATCCTCGA<br>GGTACCAGTTTATCATTATCAATACTGCC |
| TDH3Pro_R                                  | TTTGTTTGTTTATGTGTGTTTATTCG                                                          |
| CYC1ter_F                                  | TCATGTAATTAGTTATGTCACGC                                                             |
| CYC1ter_R                                  | GCAAATTAAAGCCTTCGAGC                                                                |
| <i>Lm</i> LDH_F                            | GTTTCGAATAAAACACACATAAAACAAACAAAATGAAGATTTTTGCTTATG<br>G                            |
| <i>Lm</i> LDH_R                            | AATGTAAGCGTGACATAACTAATTACATGATTAGTATTCAACTGCAATAG                                  |
| CYC1_ <i>Bam</i> HI_HIS3p<br>ro_F          | GTTTTGGGACGCTCGAAGGCTTTAATTTGCGGATCCCGTTTTAAGAGCTT<br>GGTG                          |
| DeltaDown_HIS3ter_<br>R                    | GTTGATAAAGGCTATAATATTAGGTATACAGAATATACTAGAAGTTCTCC<br>GAATCCATAGATCCGTCGAGTTC       |
| delta_gRNA1_ <i>Hind</i> III<br>_F         | ATAAAGCTTTATACTAGAAGTTCTCCTCGGTTTTAGAGCTAGAAATA                                     |
| gRNA_Rev                                   | ATACTCGAGAAAAAAGCACCG                                                               |
| DeltaUp_F                                  | TGTTGGAATAAAAATCCACTATC                                                             |
| <i>Lm</i> LDH_int_seq_R                    | ATAGCAACTCTACCGATATGACCTG                                                           |
| crRNA_F                                    | TGAAAGTTGGTGCGCATG                                                                  |
| crRNA_R                                    | GCTAGGATTCCCTGACTGTCT                                                               |
| tSUP4_F                                    | GTTTTTTATGTCTTATCGTGACGC                                                            |
| pCAS9_R                                    | GATCATTTATCTTTCCTGCGGAG                                                             |
| <b>Donor DNA primers for gene deletion</b> |                                                                                     |
| GPD1_rep_F                                 | TATATTGTACACCCCCCCCCTCCACAAACACAAATATTGATAATATAAAG<br>ATTTATTGGA                    |
| GPD1_rep_R                                 | CCTCGAAAAAAGTGGGGGAAAGTATGATATGTTATCTTTCTCCAATAAAT<br>CTTTATATTA                    |
| GPD2_rep_F                                 | AGATTCAATTCTCTTCCCTTTCCTTTTCCTTCGCTCCCCTTCCTTATCAAC<br>ACTCTCCC                     |

|            |                                                                   |
|------------|-------------------------------------------------------------------|
| GPD2_rep_R | GGAAAAAGAGGCAACAGGAAAGATCAGAGGGGGAGGGGGGGGGAGAG<br>TGTTGATAAGGAA  |
| ADH1_rep_F | GCACAATATTTCAAGCTATACCAAGCATACAATCAACTATCTCATATACA<br>GCGAATTTCT  |
| ADH1_rep_R | TTTTTTATAACTTATTTAATAATAAAAAATCATAAATCATAAGAAATTCGC<br>TGTATATGAG |

**Colony PCR primers for screening of gene deletion**

|             |                      |
|-------------|----------------------|
| GPD1_Up_F   | TGGTATTGGCAGTTTCGTAG |
| GPD1_Down_R | ATACGGACGCCAGATGCT   |
| GPD2_Up_F   | TTAGCTTACGGACCTATTGC |
| GPD2_Down_R | ACGGGCCAAATGCGACAT   |
| ADH1_Up_F   | CATTGTTCTCGTTCCCTTTC |
| ADH1_Down_R | CGATGAAGATAGAGCCCAAC |

**Table S2**

Designing of gene specific crRNA for gene deletion and homologous flanking sequences for homologous recombination with pUDE735

| Gene        | RGEN Target (5' to 3')          | Position | Direction | GC contents<br>(%, w/o PAM) | Out-of-frame<br>Score |
|-------------|---------------------------------|----------|-----------|-----------------------------|-----------------------|
| <i>gpd1</i> | (TTTA)GACAGGAGATAGCTCTGACGTGTGA | 427      | -         | 52                          | 77.9                  |
| <i>gpd2</i> | (TTTA)GACACGAGATGGCCCTTACATGAGG | 574      | -         | 56                          | 79.1                  |
| <i>adh1</i> | (TTTG)GCTTTGGAAGTGAATATCTTTGTA  | 61       | -         | 36                          | 74.2                  |

**Homologous flanking sequences to pUDE735**

|                          |                                                                                  |
|--------------------------|----------------------------------------------------------------------------------|
| Upstream of BstBI site   | 5'TGAAAGTTGGTGCGCATGTTTCGGCGTTCGAAACTTCTCCGCAGTGAAA<br>GATAAATGATC3'             |
| Downstream of BstBI site | 5'GTTTTTTATGTCTTATCGTGACGCAGTCCCATGGGCCATTACAACTCAT<br>GCAGACAGTCAGGGAATCCTAGC3' |

Note: Each gene specific crRNA was designed by the CRISPR RGEN tools which utilizes the algorithms described by Bae et al., 2014; Bae, Park, and Kim, 2014; Park, Bae, and Kim, 2015. The crRNAs that have high out-of-frame score (>66) with the appropriate characteristics described by Swiat et al., 2017 were chosen.

**Table S3**

Carboxylic acids, furfural and hydroxymethyl furfural detected in slurry of alkaline pretreated sugarcane bagasse

|                        | Slurry fraction<br>(g/L) |
|------------------------|--------------------------|
| Lactic acid            | N.D.                     |
| Glycerol               | 0.26 ± 0.00              |
| Formic acid            | N.D.                     |
| Acetic acid            | 3.06 ± 0.15              |
| Levulinic acid         | N.D.                     |
| Furfural               | N.D.                     |
| Hydroxymethyl furfural | N.D.                     |

\* N.D. indicates that the component was not detected

**Table S4**

Maximum specific growth rate of all *Saccharomyces cerevisiae* strains used in this study

| Strain                       | YPD                    | YPD + synHT            |
|------------------------------|------------------------|------------------------|
|                              | $\mu_{\max}^*(h^{-1})$ | $\mu_{\max}^*(h^{-1})$ |
| CEN.PK2 <i>DLDHΔgpd</i>      | 0.061 ± 0.006          | 0.015 ± 0.001          |
| CEN.PK2 <i>DLDHΔgpdΔadh1</i> | 0.036 ± 0.004          | 0.012 ± 0.001          |
| BCC39850                     | 0.082 ± 0.002          | 0.029 ± 0.002          |
| CEN.PK2-1C                   | 0.060 ± 0.002          | 0.016 ± 0.001          |
| CEN.PK2 <i>DLDH</i>          | 0.066 ± 0.005          | 0.011 ± 0.001          |
| Hybrid2                      | 0.091 ± 0.004          | 0.032 ± 0.002          |
| Hybrid35                     | 0.058 ± 0.003          | 0.026 ± 0.003          |
| Hybrid36                     | 0.068 ± 0.003          | 0.015 ± 0.001          |

\*Data represent mean values of biological triplicates and error bars indicate standard deviations.

**Table S5**

Glycerol production by *Saccharomyces cerevisiae* strains used in this study

| Strain                       | Glycerol production (g/L) |             |             |             |
|------------------------------|---------------------------|-------------|-------------|-------------|
|                              | 16h                       | 24h         | 40h         | 48h         |
| CEN.PK2-1C                   | 1.35 ± 0.03               | 1.40 ± 0.04 | 1.47 ± 0.04 | 1.50 ± 0.04 |
| BCC39850                     | 3.56 ± 0.07               | 3.89 ± 0.04 | 3.98 ± 0.05 | 4.02 ± 0.05 |
| CEN.PK2 <i>DLDH</i>          | 1.27 ± 0.06               | 1.92 ± 0.02 | 2.05 ± 0.10 | 2.11 ± 0.04 |
| Hybrid2                      | 1.75 ± 0.06               | 1.86 ± 0.07 | 1.81 ± 0.09 | 1.82 ± 0.09 |
| Hybrid35                     | 2.13 ± 0.03               | 2.95 ± 0.13 | 2.79 ± 0.20 | 2.91 ± 0.17 |
| Hybrid36                     | 1.52 ± 0.06               | 2.67 ± 0.09 | 3.27 ± 0.09 | 3.17 ± 0.10 |
| CEN.PK2 <i>DLDHΔgpd</i>      | N.D.                      | N.D.        | N.D.        | N.D.        |
| CEN.PK2 <i>DLDHΔgpdΔadh1</i> | N.D.                      | N.D.        | N.D.        | N.D.        |

N.D. indicates that the metabolite was not detected

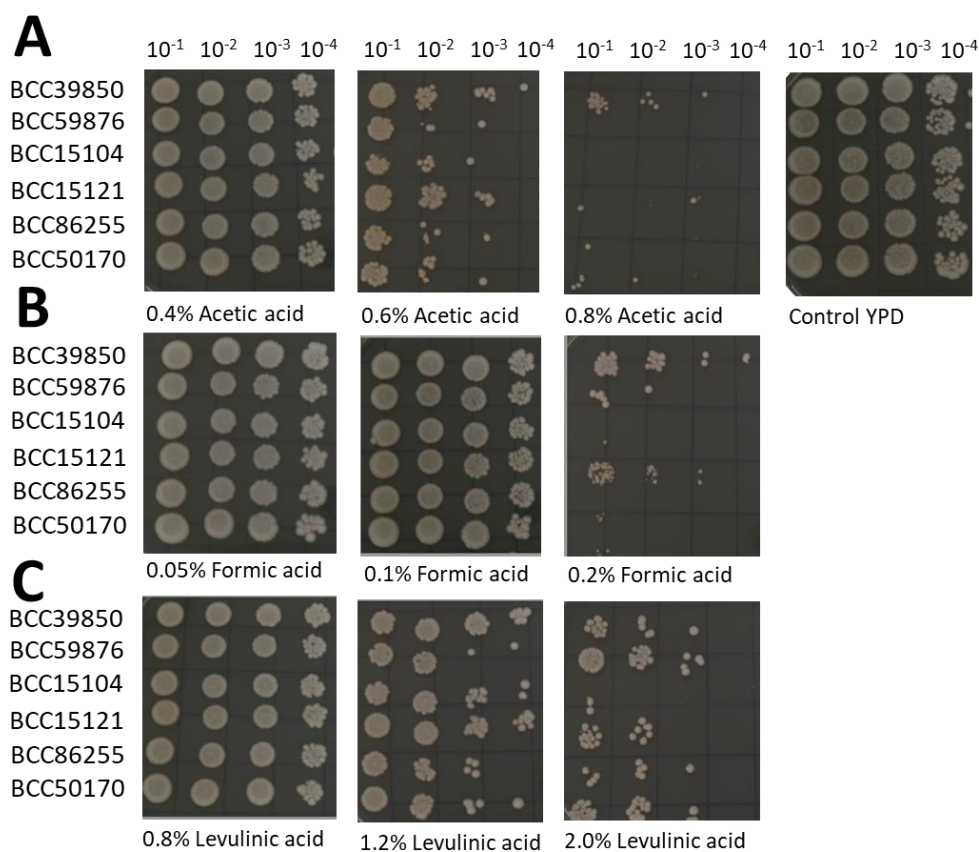

**Figure S1** Acetic acid, formic acid and levulinic acid tolerant test of wild *Saccharomyces cerevisiae* strains; BCC39850, BCC59876, BCC15104, BCC15121, BCC86255 and BCC50170. Growth of all strains were recorded at day 3 after spotted on YPD plate containing 0, 4, 6 and 8 g/L acetic acid (A), 0.5, 1.0 and 2.0 g/L formic acid (B) and 8, 12 and 20 g/L levulinic acid (C).

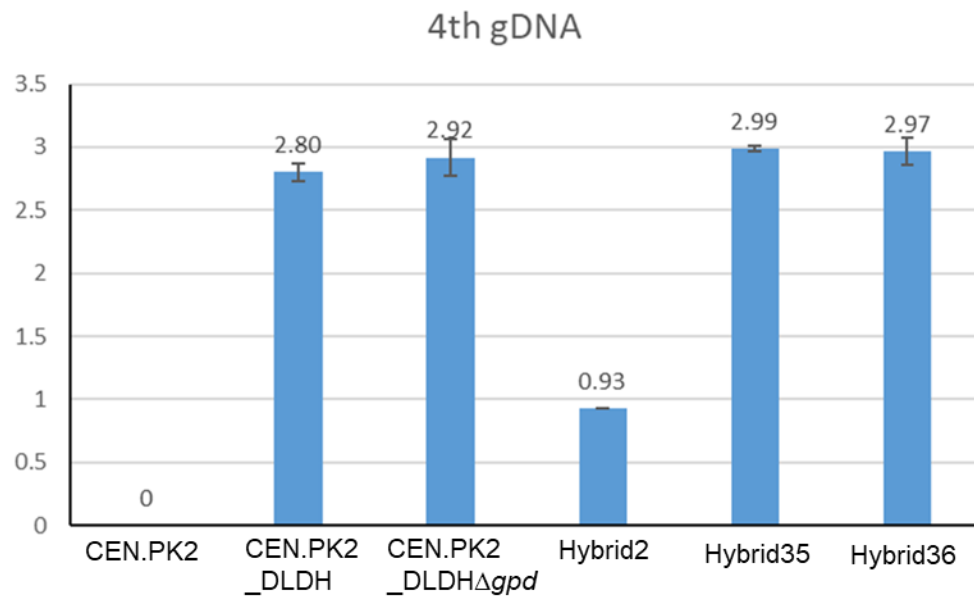

**Figure S2** Quantification of *LmldhA* copy number among the strains by qPCR
